# Supplementary material for: First Detection of Bat White-Nose Syndrome in Western North America
Source: PubMed Central journal article supplement (PMC4973635; doi:10.1128/msphere.00148-16), 2016-08-03
Supplement: sph004162125sf1.pdf [file sph004162125sf1.pdf]

COI

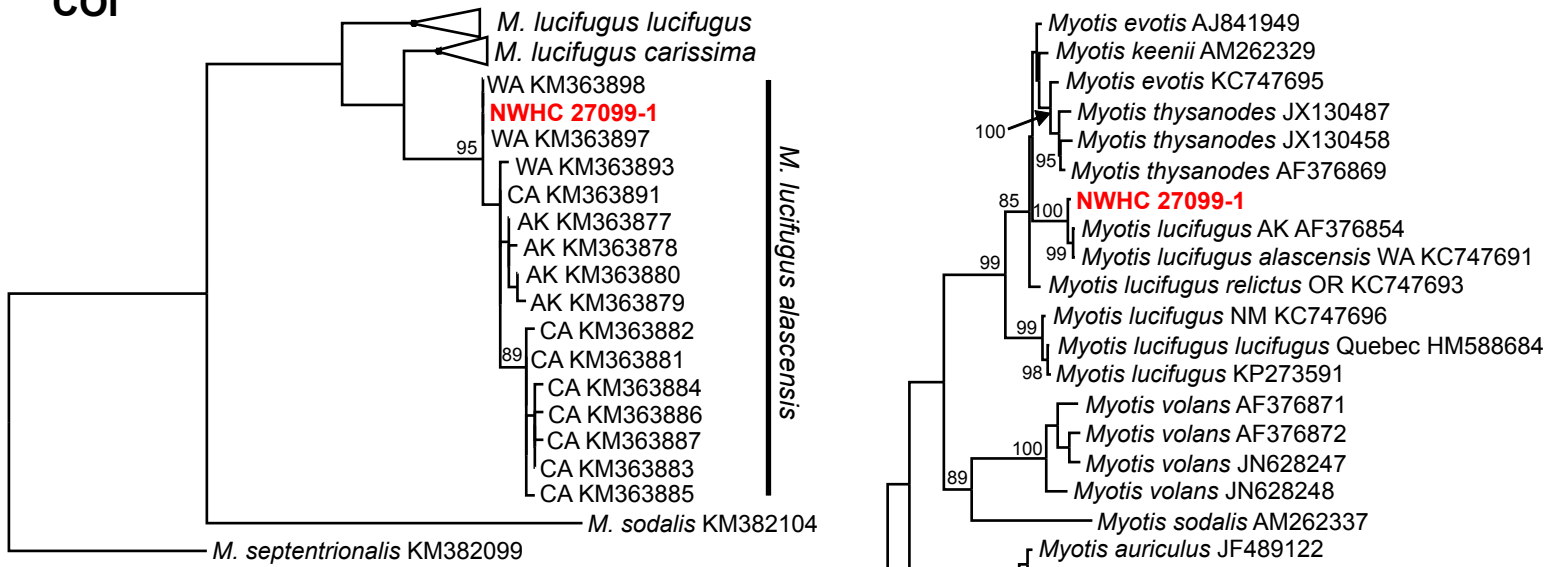

0.02

cytb

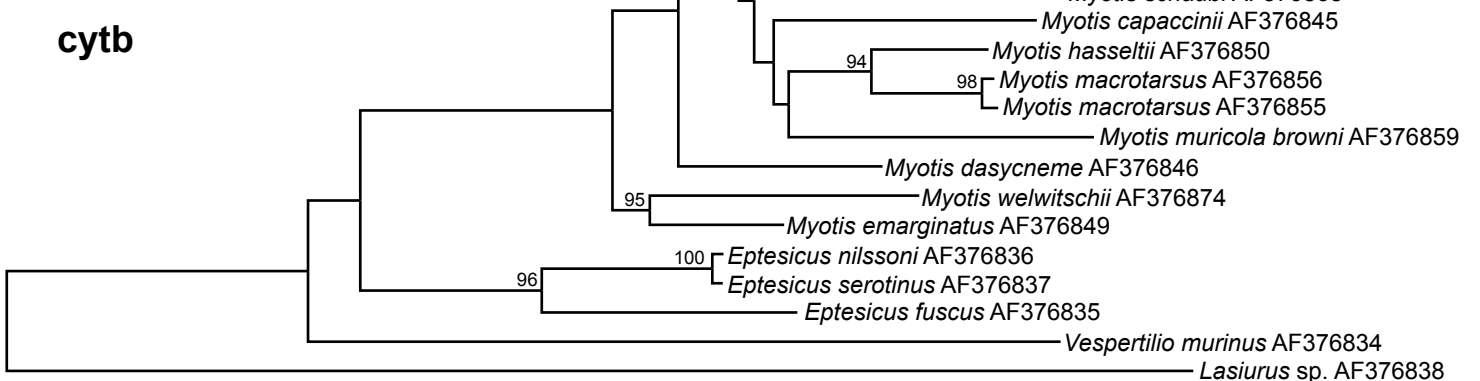

0.2
